# Supplementary material for: Resveratrol glucosylation by GTF-SI from Streptococcus mutans: computational insights into a GH70 family enzyme
Source: Royal Society of Chemistry journal article supplement (doi:10.1039/d3ob01529g), 2023-01-01
Supplement: d3ob01529g1.pdf [file d3ob01529g1.pdf]

# Resveratrol Glucosylation by GTF-SI from *Streptococcus mutans*: Computational Insights into a GH70 Family Enzyme

## Electronic Supplementary Information

Camilo Febres-Molina,<sup>a</sup> Xavier Prat-Resina<sup>b</sup> and Gonzalo A. Jaña<sup>\*c</sup>

<sup>a</sup> Doctorado en Físicoquímica Molecular, Facultad de Ciencias Exactas, Universidad Andres Bello, Santiago - Chile. <sup>b</sup> Center for Learning Innovation, University of Minnesota Rochester, Rochester, Minnesota 55904, United States. <sup>c</sup> Departamento de Ciencias Químicas, Facultad de Ciencias Exactas, Universidad Andres Bello, Concepción - Chile. E-mail: gonzalo.jana@unab.cl

\*Author to whom correspondence should be addressed.  
gonzalo.jana@unab.cl

## Contents

### Supplementary figures

|   |                                                                                                           |   |
|---|-----------------------------------------------------------------------------------------------------------|---|
| 1 | <b>Fig. SF1</b> Crystallographic structure of glucosyltransferase-SI . . . . .                            | 3 |
| 2 | <b>Fig. SF2</b> Active site residues RMSD for MD <sub>rest</sub> and MD <sub>free</sub> systems . . . . . | 4 |
| 3 | <b>Fig. SF3</b> RMSF represented by B-factor on both systems proteins. . . . .                            | 5 |
| 4 | <b>Fig. SF4</b> Active site water molecules. . . . .                                                      | 5 |
| 5 | <b>Fig. SF5</b> SASA histograms . . . . .                                                                 | 6 |
| 6 | <b>Fig. SF6</b> Solvent-accessible volume on both systems proteins. . . . .                               | 6 |
| 7 | <b>Fig. SF7</b> Arg <sup>475</sup> interaction. . . . .                                                   | 7 |
| 8 | <b>Fig. SF8</b> Eigenvectors of the transition state frequency calculation. . . . .                       | 8 |

### Supplementary table

|   |                                                                                                                                                   |   |
|---|---------------------------------------------------------------------------------------------------------------------------------------------------|---|
| 1 | <b>Table ST1</b> Activation barriers calculated at the QM(DFTB3)/MM of six GTF-SI MD <sub>rest</sub> frames and the DFT-based structure . . . . . | 7 |
|---|---------------------------------------------------------------------------------------------------------------------------------------------------|---|

### Supplementary Materials

The coordinates of the relevant states along the Minimum Energy Path for the study of Resveratrol Glucosylation by GTF-SI can be accessed at the following link: [GitHub Repository](#).

## Supplementary Figures

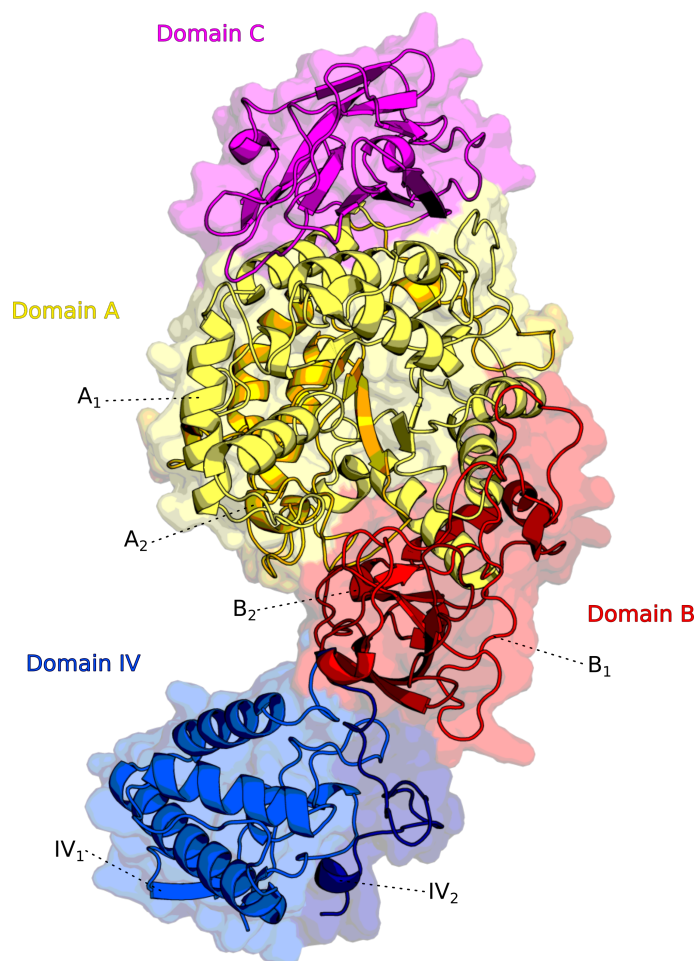

**Fig. SF1** Crystallographic structure of glucosyltransferase-SI with PDB ID 3AIE - chain C.<sup>1</sup> Domains A, B, IV, and C are depicted in shades of yellow, red, blue, and magenta, respectively.

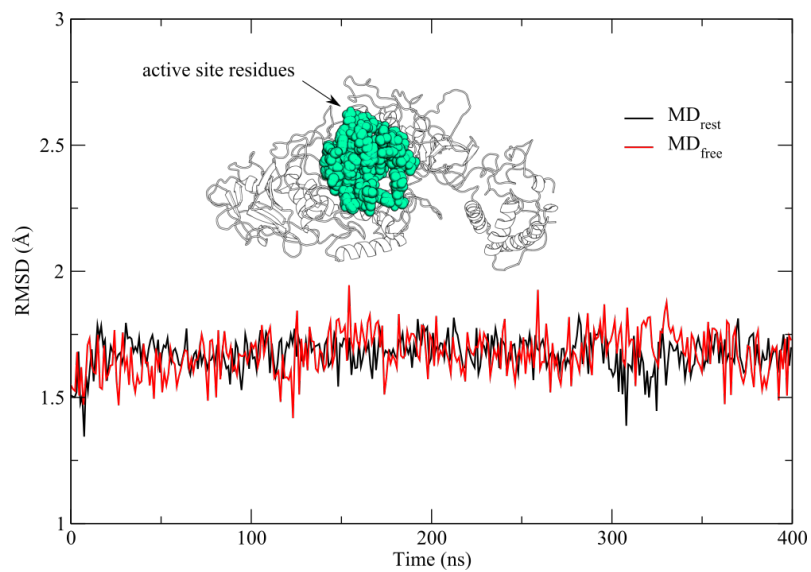

**Fig. SF2** RMSD of the active site residues for the systems  $MD_{rest}$  and  $MD_{free}$  relative to the crystallographic structure with PDB ID 3AIE. t-Student test showed no significant difference between the two.

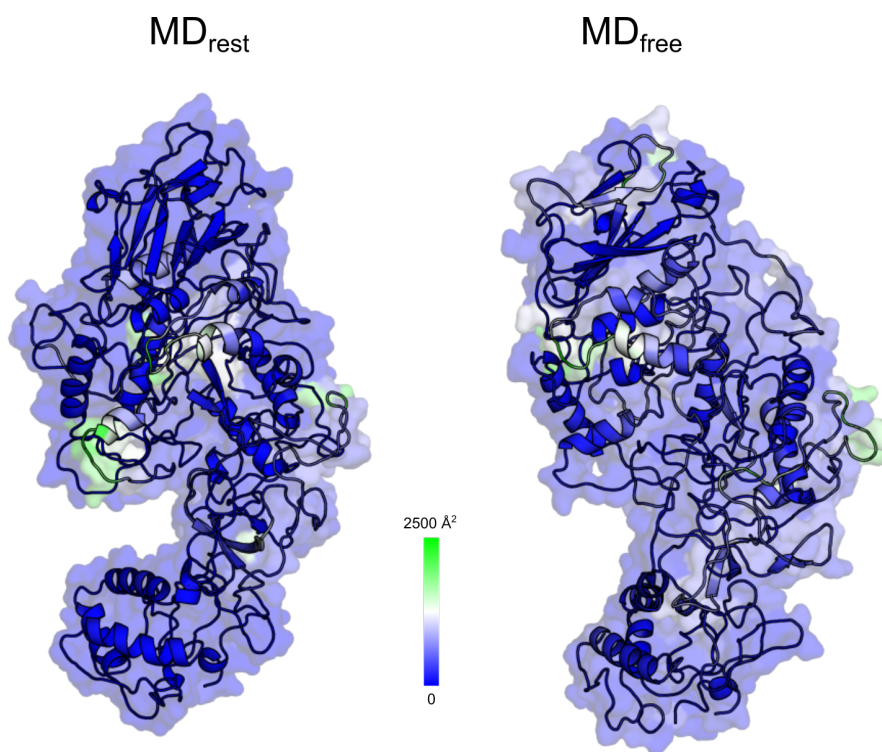

**Fig. SF3** Fluctuations illustrated by B-factor on representative MD<sub>rest</sub> and MD<sub>free</sub> structures. Blue, white, and green colors indicate low, medium, and high residue fluctuations, respectively, calculated on the last 300 ns of the MD.

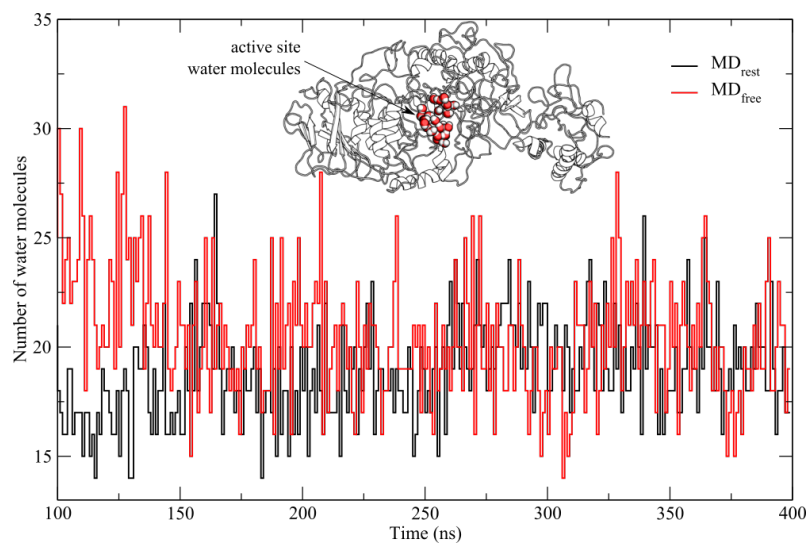

**Fig. SF4** Active site water molecules present throughout the stable part of the MD production. Mean values of  $19 \pm 2$  and  $20 \pm 3$  water molecules for the MD<sub>rest</sub> and MD<sub>free</sub> systems, respectively.

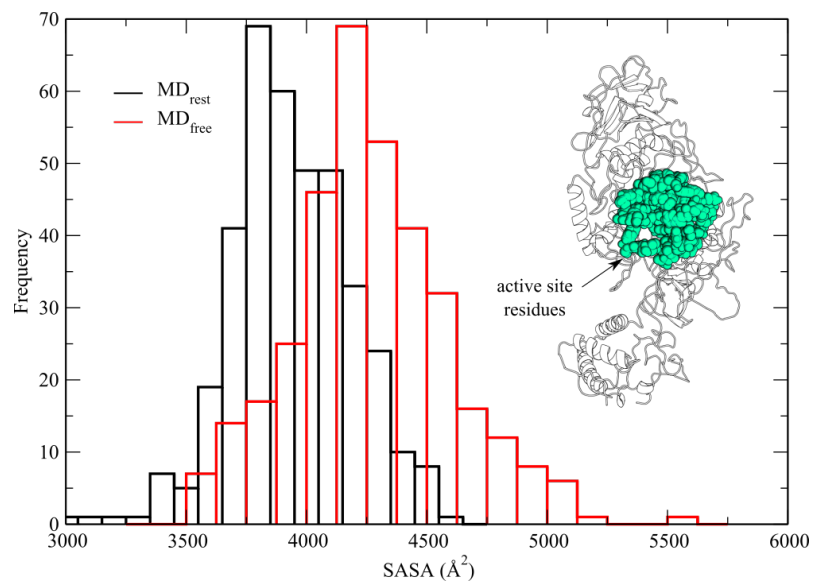

**Fig. SF5** Histogram of solvent-accessible surface area for active site residues of both systems.

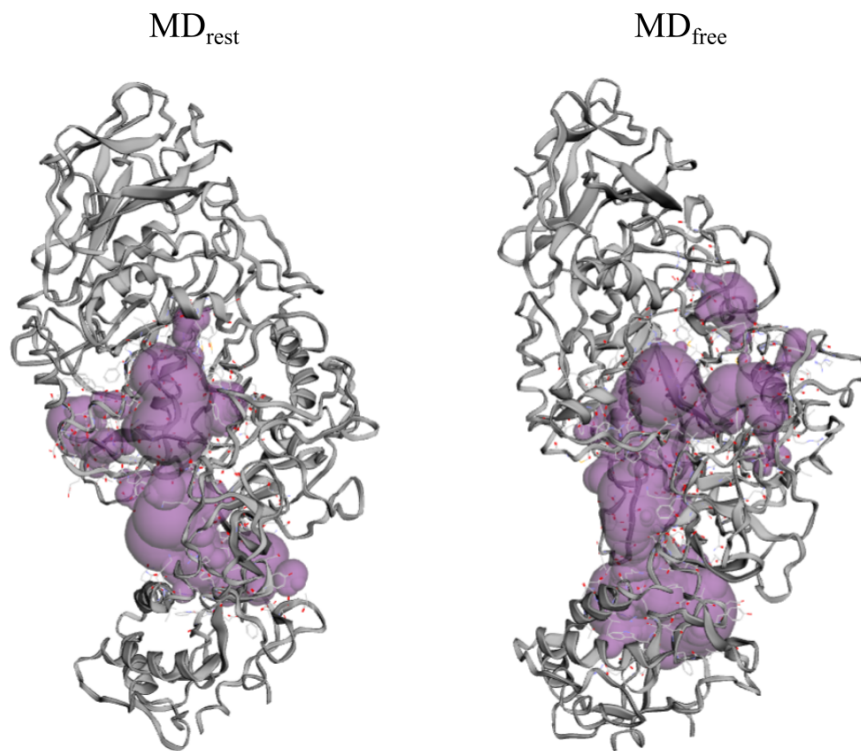

**Fig. SF6** Solvent-accessible volume with values of 3518.3 and 4159.9 Å<sup>3</sup> calculated for the inner pocket<sup>2</sup> of the MD<sub>rest</sub> and MD<sub>free</sub> systems, respectively.

**Table ST1** Activation barriers calculated at the QM(DFTB3)/MM(CHARMM) theory level of different frames of the MD<sub>rest</sub> system along the MD production and with the initial DFT-based structure.

| MD <sub>rest</sub> frame | E barrier, kcal·mol <sup>-1</sup> | Avg. | Std. |
|--------------------------|-----------------------------------|------|------|
| 167                      | 10.6                              |      |      |
| 257                      | 13.4                              |      |      |
| 259                      | 12.4                              | 11.5 | 3.4  |
| 339                      | 12.0                              |      |      |
| 370                      | 5.2                               |      |      |
| 376                      | 15.1                              |      |      |
| DFT-based structure      | 6.2                               | -    | -    |

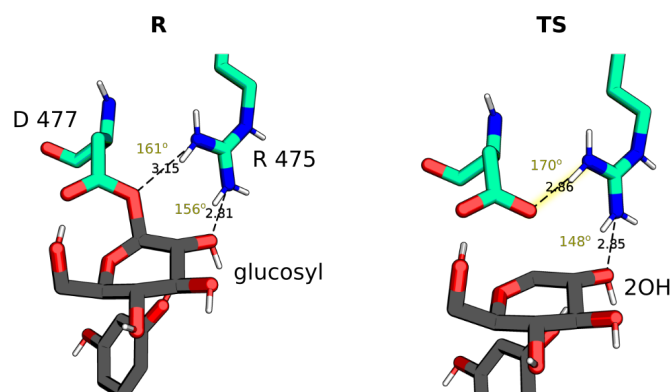

**Fig. SF7** Interaction of Arg<sup>475</sup> in the reactant and transition states of the MEP. The interaction with the 2OH group of the glucosyl moiety in the TS is highlighted due to its relevance in stabilizing the TS.

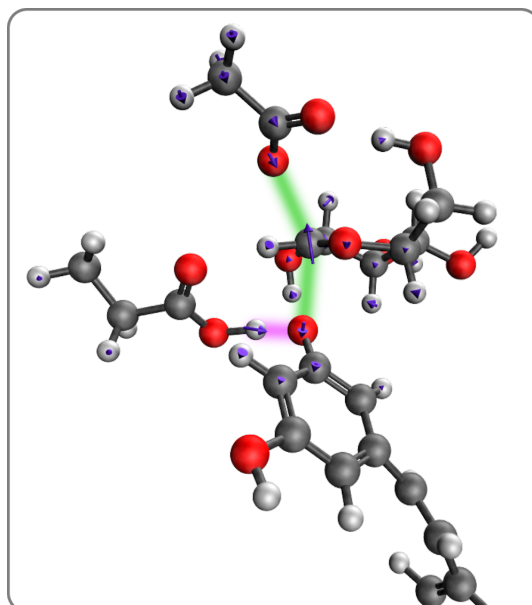

**Fig. SF8** Eigenvectors (in purple) of the transition state frequency calculation. The green line shows the atoms involved in bond breaking and the nucleophilic attack. The magenta line shows the atoms involved in proton transfer.

## References

- [1] Ito K, Ito S, Shimamura T, Weyand S, Kawarasaki Y, Misaka T, et al. Crystal structure of glucansucrase from the dental caries pathogen *Streptococcus mutans*. *Journal of molecular biology*. 2011;408(2):177-86.
- [2] Tian W, Chen C, Lei X, Zhao J, Liang J. CASTp 3.0: computed atlas of surface topography of proteins. *Nucleic acids research*. 2018;46(W1):W363-7.
